# Supplementary material
Source: publisher figshare collection journal article supplement (https://sage.figshare.com/ndownloader/files/22659674)
Supplement: Supplementary file 1 [file 22659674]

Table 1. History of The Journal of School Nursing Writing Awards: 2010-2020.

| Year | Award                         | Author/Citation                                                                                                                                                                                                                                                                                                                                                                                   | Altmetric |
|------|-------------------------------|---------------------------------------------------------------------------------------------------------------------------------------------------------------------------------------------------------------------------------------------------------------------------------------------------------------------------------------------------------------------------------------------------|-----------|
| 2010 | Publication by a school nurse | Patricia Prenni/Caring for the student with Wolff Parkinson-White Syndrom, 2010, <i>The Journal of School Nursing</i> 25, 327-332.<br><a href="https://doi.org/10.1177/1059840509335556">doi.org/10.1177/1059840509335556</a>                                                                                                                                                                     |           |
|      | Scholarly Writing Award       | Erin Maughan/Part 1—Factors Associated with School Nurse Ratios: An Analysis of State Data (2009) <i>The Journal of School Nursing</i> 25, 214-221<br>Part 2- Factors Associated with School Nurse Ratios: Key State Informants' Perceptions. (2009) <i>the Journal of School Nursing</i> ,25, 292-301<br><a href="https://doi.org/10.1177/1059840509337723">doi.org/10.1177/1059840509337723</a> |           |
| 2011 | Publication by a School Nurse | Robin Adair Shannon, Martha Dewey Bergren, Alicia Matthews/ Frequent Visitors: Somatization in School-Age Children and Implications for School Nurses. (2010). <i>The Journal of School Nursing</i> ,26, 169-182.<br><a href="https://doi.org/10.1177/1059840509356777">doi.org/10.1177/1059840509356777</a>                                                                                      | 4         |
|      | Scholarly Writing Award       | Lorraine B. Robbins, Henry C. Talley, Tsu-Yin Wu, JoEllen Wilbur. (2010). Sixth-grade Boys' Perceived Benefits of and Barriers to Physical Activity and Suggestions for Increasing Physical Activity. (2010) <i>Journal of School Nursing</i> ,26, 65-77. <a href="https://doi.org/10.1177/1059840509351020">doi.org/10.1177/1059840509351020</a>                                                 |           |
| 2012 | Publication by a School Nurse | Gail Hoxie-Setterstrom & Barbara Hoglulnd B. (2011). School Wellness Policies: Opportunities for Change. <i>The Journal of School Nursing</i> 27(5), 330-339. <a href="https://doi.org/10.1177/1059840511409755">doi.org/10.1177/1059840511409755</a>                                                                                                                                             |           |
|      | Scholarly Writing Award       | Suzan Song, Robert Ziegler, Lisa Arsenault, Lise Fried, & Karen Hacker, (2011). Asian Student Depression in American High Schools: Differences in Risk Factors. <i>Journal of School Nursing</i> 27(6), 455-462.<br><a href="https://doi.org/10.1177/1059840511418670">doi.org/10.1177/1059840511418670</a>                                                                                       | 2         |

Table 1. History of The Journal of School Nursing Writing Awards: 2010-2020.

|      |                               |                                                                                                                                                                                                                                                                                                                                                  |    |
|------|-------------------------------|--------------------------------------------------------------------------------------------------------------------------------------------------------------------------------------------------------------------------------------------------------------------------------------------------------------------------------------------------|----|
| 2013 | Publication by a School Nurse | Ponzurick, J. (2012). Selective Mutism: A Team Approach to Assessment and Treatment in the School Setting. <i>The Journal of School Nursing</i> , 26, 31-37. <a href="https://doi.org/10.1177/1059840511422534">doi.org/10.1177/1059840511422534</a>                                                                                             | 1  |
|      | Scholarly Writing Award       | Kristy Martyn, Cynthis Darling-Fisher, Michele Pardee, David Ronis, Irene Felicetti, & Melissa Saftner, (2012). Improving Sexual Risk Communication With Adolescents Using Event History Calendars . <i>The Journal of School Nursing</i> , 28, 108-115. <a href="https://doi.org/10.1177/1059840511426577">doi.org/10.1177/1059840511426577</a> |    |
| 2014 | Publication by a School Nurse | Julia Olsta. (2013). Bringing Breakfast to Our Students: Program to Increase School Breakfast Participation, <i>The Journal of School Nursing</i> , 29, 329-336. <a href="https://doi.org/10.1177/1059840513476094">doi.org/10.1177/1059840513476094</a>                                                                                         | 3  |
|      | Scholarly Writing Award       | Laureen Smith, & Christipher Holoman. (2013). Comparing the Effects of Teen Mentors to Adult Teachers on Child Lifestyle Behaviors and Health Outcomes in Appalachia. <i>The Journal of School Nursing</i> , 29, 386-396. <a href="https://doi.org/10.1177/1059840512472708">doi.org/10.1177/1059840512472708</a>                                | 21 |
| 2015 | Publication by a School Nurse | Allison, V. L., Nativio, D. G., Mitchell, A. M., Ren, D., & Yuhasz, J. (2014). Identifying Symptoms of Depression and Anxiety in Students in the School Setting. <i>Journal of School Nursing</i> , 30, 165-172.                                                                                                                                 | 12 |
|      | Scholarly Writing Award       | Inge Wissink, Maja Dekovic, Geert-JanStams, Jessica Asscher, Esther Rutten, & Bonne Zijlstra. (2014). Moral Orientation and Relationships in School and Adolescent Pro- and Antisocial Behaviors: A Multilevel                                                                                                                                   |    |

Table 1. History of The Journal of School Nursing Writing Awards: 2010-2020.

|      |                               |                                                                                                                                                                                                                                                                                                                                                                                                 |    |
|------|-------------------------------|-------------------------------------------------------------------------------------------------------------------------------------------------------------------------------------------------------------------------------------------------------------------------------------------------------------------------------------------------------------------------------------------------|----|
|      |                               | Study. <i>Journal of School Nursng</i> , 30, 216-225.<br><a href="https://doi.org/10.1177/1059840513497402">doi.org/10.1177/1059840513497402</a>                                                                                                                                                                                                                                                |    |
| 2016 | Publication by a School Nurse | Rachel McClanahan, & Penny Weismuller (2015). School Nurses and Care Coordination for children with Complex Needs: An Integrative Review. <i>The Journal of School Nursing</i> , 31, 34-43.<br><a href="https://doi.org/10.1177/1059840514550484">doi.org/10.1177/1059840514550484</a>                                                                                                          | 12 |
|      | Scholarly Writing Award       | Tucker, S., & Lanningham-Foster, L. (2015). Nurse-Led School-Based Child obesity Prevention. <i>The Journal of School Nursng</i> , 31, 450-466.<br><a href="https://doi.org/10.1177/1059840515574002">doi.org/10.1177/1059840515574002</a>                                                                                                                                                      | 10 |
| 2017 | Publication by a School Nurse | Nadeau, E. H., & Toronto, C. (2016). Barriers to Asthma Management for School Nurses: An Integrative Review. <i>The Journal of School Nursing</i> , 32, 86-98, <a href="https://doi.org/10.1177/1059840515621607">doi.org/10.1177/1059840515621607</a>                                                                                                                                          | 5  |
|      | Scholarly Writing Award       | Miller, G. F., Coffield, E., Leroy, Z., & Wallin, R. (2016). Prevalence and Costs of Five Chronic Conditions in Children. <i>The Journal of School Nursing</i> , 32, 357-364, <a href="https://doi.org/10.1177/1059840516641190">doi.org/10.1177/1059840516641190</a>                                                                                                                           | 8  |
| 2018 | Publication by a School Nurse | Not awarded                                                                                                                                                                                                                                                                                                                                                                                     |    |
|      | Scholarly Writing Award       | Davis, MM., Spurlock, M., Ramsey, K., Smith, J., Beamer, B., & Aromaa, S. (2017). Milk Options Observation (MOO): A Mixed-Methods Study of Chocolate Milk Removal on Beverage Consumption and Student Staff Behaviors in a Rural Elementary School. <i>The Journal of School Nursing</i> , 33, 285-298, <a href="https://doi.org/10.1177/1059840516641190">doi.org/10.1177/1059840516641190</a> |    |

Table 1. History of The Journal of School Nursing Writing Awards: 2010-2020.

|      |                               |                                                                                                                                                                                                                                                                                                                            |   |
|------|-------------------------------|----------------------------------------------------------------------------------------------------------------------------------------------------------------------------------------------------------------------------------------------------------------------------------------------------------------------------|---|
| 2019 | Publication by a School Nurse | Not awarded                                                                                                                                                                                                                                                                                                                |   |
|      | Scholarly Writing Award       | Nakia Best, Sonda Oppewal, & Debbie Travers. (2018). Exploring School Nurse Interventions and Health Outcomes: An Integrative Review . <i>The Journal of School Nursing</i> , 34, 121-127, <a href="https://doi.org/10.1177/1059840517745359">doi.org/10.1177/1059840517745359</a>                                         |   |
| 2020 | Publication by a School Nurse | <a href="#">Eileen Moss</a> , <a href="#">Martha Dewey Bergren</a> & <a href="#">Erin D. Maughan</a> , (2019) School Nurse Websites: What Do They Tell Us About School Nurses? <i>The Journal of School Nursing</i> . 35, 395-400. <a href="https://doi.org/10.1177/1059840519843315">doi.org/10.1177/1059840519843315</a> | 6 |
|      | Scholarly Writing Award       | <a href="#">Maureen Rabbitte</a> , <a href="#">Maithe Enriquez</a> , (2019) The Role of Policy on Sexual Health Education in Schools: Review (2020). <i>The Journal of School Nursing</i> , 35, 27-38. <a href="https://doi.org/10.1177/1059840518789240">doi.org/10.1177/1059840518789240</a>                             | 8 |
